# Supplementary material
Source: Springer Nature journal article supplement (https://www.springermedizin.de/resource/supplementary/12936_2010_1304_MOESM5_ESM.pdf/9549456)

Size equivalent to 400 people

Size equivalent to 96 people

Moderate

Normal

Severe

Area of clustering

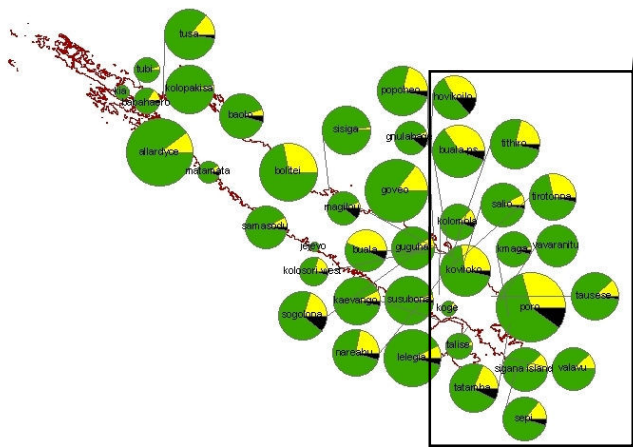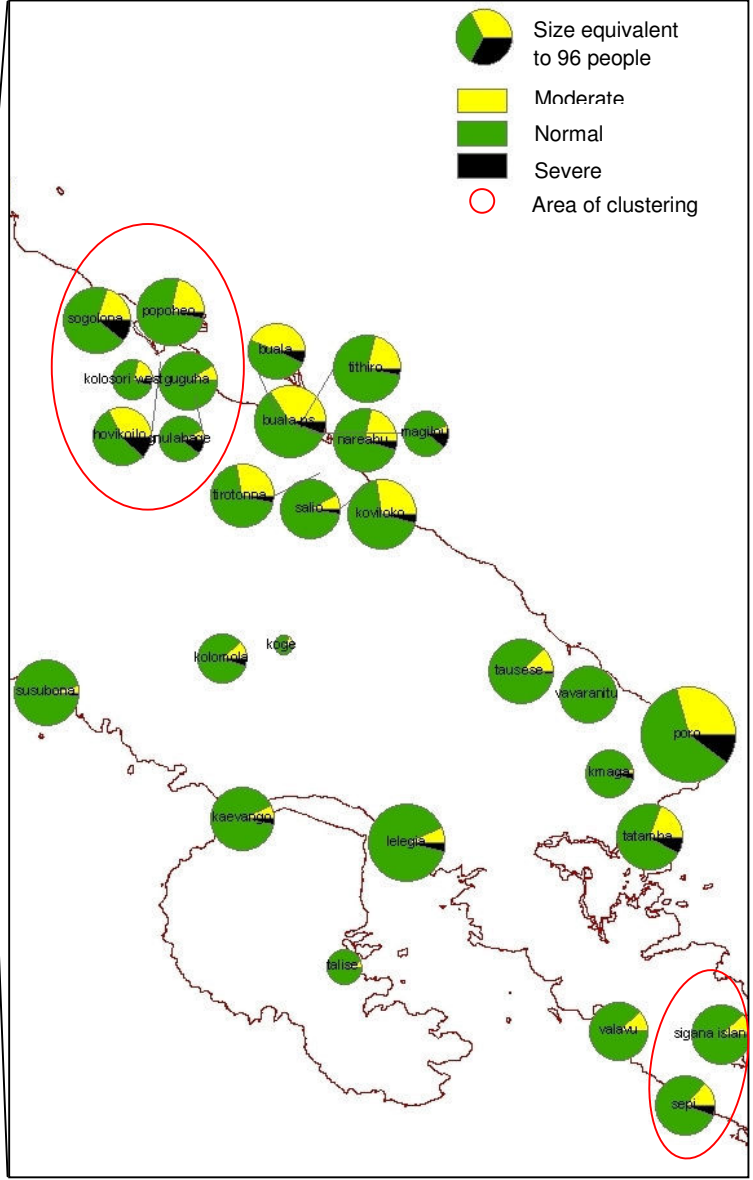

Supplement: MOESM5 [file 9549456]
